# Supplementary material for: Distinct Impact of RNF213 p.R4810K Genotype on Transdural Collateral Formation Across Japanese Asian and Polish Caucasian Moyamoya Patients
Source: Research Square preprint supplement (doi:10.21203/rs.3.rs-7226764/v1), 2025-09-23
Supplement: Supplementary file 1 [file 4d483883829ff8015b127853.docx]

|  | | Japanese *RNF213* p.R4810K variant | Japanese *RNF213* p.R4810K wild-type | Polish | P value | |
| --- | --- | --- | --- | --- | --- | --- |
| Affected hemispheres, number | 120 | | 53 | 57 | Japanese variant vs Polish | Japanese variant vs Japanese wild-type |
| Suzuki angiographical stage, number | | | | | | |
| Stage 1 | 12 | | 8 | 2 | 0.27 | 0.24 |
| Stage 2 | 23 | | 7 | 9 |
| Stage 3 | 28 | | 12 | 15 |
| Stage 4 | 36 | | 12 | 20 |
| Stage 5 | 21 | | 12 | 9 |
| Stage 6 | 0 | | 2 | 2 |
| Transdural collateral, number, percentage of total for each stage (%) | | | | | | |
| Stage 1 | 0 (0%) | | 0 (0%) | 0 (0%) | 0.65 | 0.0026** |
| Stage 2 | 3 (13%) | | 2 (29%) | 2 (22%) |
| Stage 3 | 12 (43%) | | 3 (25%) | 7 (47%) |
| Stage 4 | 21 (58%) | | 4 (33%) | 15 (75%) |
| Stage 5&6 | 17 (81%) | | 8 (67%) | 8 (89%) |
| Grade2 PA collateral, number, percentage of total for each stage (%) | | | | | | |
| Stage 1 | 0 (0%) | | 0 (0%) | 0 (0%) | <0.0001******** | <0.0001******** |
| Stage 2 | 0 (0%) | | 3 (43%) | 0 (0%) |
| Stage 3 | 12 (43%) | | 4 (33%) | 3 (20%) |
| Stage 4 | 19 (53%) | | 4 (33%) | 4 (20%) |
| Stage 5&6 | 12 (57%) | | 0 (0%) | 0 (0%) |
| PCA collateral, number, percentage of total for each stage (%) | | | | | | |
| Stage 1 | 2 (17%) | | 0 (0%) | 0 (0%) | <0.0001******** | <0.0001******** |
| Stage 2 | 15 (65%) | | 7 (100%) | 9 (100%) |
| Stage 3 | 23 (82%) | | 9 (75%) | 12 (80%) |
| Stage 4 | 35 (97%) | | 12 (100%) | 19 (95%) |
| Stage 5&6 | 21 (100%) | | 12 (100%) | 8 (89%) |

**Supplementary Table**

Comparison of angiographical stages and natural collateral formation among Japanese patients with *RNF213* p.R4810K variant, wild-type genotype, and Polish Caucasian patients with Moyamoya disease.

Note that the wild-type *RNF213* p.R4810K genotype was present in 100% of Polish Caucasian patients. The variant *RNF213* p.R4810K genotype in Japanese patients were all heterozygotes.

PA: periventricular anastomosis, PCA: posterior cerebral artery

**: P<0.01, ****: P<0.0001

Supplementary FIG. 1. Subgroup Comparisons in Japanese cohort for Suzuki angiographical stage (A), natural transdural collateral formation (B), and prominent grade 2 periventricular anastomosis (PA) collateral formation (C) between patients with and without *RNF213* p.R4810K variant. ns: not significant, **: P<0.01. ****: P<0.0001

Supplementary FIG. 2. Subgroup Comparisons for Suzuki angiographical stage (A), natural transdural collateral formation (B), and prominent grade 2 periventricular anastomosis (PA) collateral formation (C) between Polish patients and Japanese patients with *RNF213* p.R4810K variant. ns: not significant, ****: P<0.0001

Supplementary FIG. 3. Subgroup Comparisons for posterior cerebral artery (PCA) derived leptomeningeal collateral formation among Japanese entire cohort, Polish Caucasian patients, Japanese patients with *RNF213* p.R4810K variant, and those with *RNF213* p.R4810K wild-type. ns: not significant, ****: P<0.0001
